# Supplementary material
Source: MDPI journal article supplement (https://www.mdpi.com/2227-9059/10/1/193)
Supplement: s1 [file s1]

Archive with 1 entries (1 files):
- ALIROCKS Supplements Laboratory_13JAN2022_incl NMRS.pdf
